# Supplementary material for: Molecular mapping of a novel non-canonical gibberellin-sensitive dwarfing gene Rht29 in wheat (Triticum aestivum)
Source: Research Square preprint supplement (doi:10.21203/rs.3.rs-8634203/v1), 2026-02-18
Supplement: Supplementary file 1 [file c71f91e0beacf287f2cb945c.xlsx]

## Sheet: Table S1
Table S1 Kompetitive Allele-Specific PCR Markers
Marker type	Marker name	Position (V2.1)	Variants	Primer sequences
KASP				FAM primer (5'-3')	HEX primer (5'-3')	COM primer (5'-3')
	M1	788756124	C/T	GAAGGTGACCAAGTTCATGCTTGACTTCTTGTTAACCTTTC	GAAGGTCGGAGTCAACGGATTTGACTTCTTGTTAACCTTTT	CAACTTATTCGAGTCCACTG
	M2	795907355	A/G	GAAGGTGACCAAGTTCATGCTGTGGAGCTTGTAGAACTAGT	GAAGGTCGGAGTCAACGGATTGTGGAGCTTGTAGAACTAGC	CCACCTAGAGAAAAGATCAGT
	M3	798921231	T/C	GAAGGTGACCAAGTTCATGCTCCCGTAGACCTTCAGCCA	GAAGGTCGGAGTCAACGGATTCCCGTAGACCTTCAGCCG	CGCATTCTTCCACCTATGTC
	M4	803440768	T/C	GAAGGTGACCAAGTTCATGCTCTCCTAAGCCCACCGTTT	GAAGGTCGGAGTCAACGGATTCTCCTAAGCCCACCGTTC	ATCCTGCTAGACAACGGT
	M5	807372506	G/A	GAAGGTGACCAAGTTCATGCTAATCCTCTGTCAAGCTCTGG	GAAGGTCGGAGTCAACGGATTAATCCTCTGTCAAGCTCTGA	TCTTTCATGTGGCTGATGTT

## Sheet: Table S2
Table S2 The 200 individuals of the F2 population employed in the construction of the genetic linkage map
Individuals ID	Plant Height (cm)	Genotype
		M1	M2	M3	M4	M5
1	92	A	A	A	A	A
2	90	A	A	A	A	A
3	82	H	H	H	H	H
4	75.5	H	H	H	H	H
5	56.5	B	B	B	B	B
6	68	B	H	H	H	H
7	66	H	H	H	H	H
8	67	H	H	H	H	H
9	56	B	B	B	B	B
10	79.5	H	A	A	A	A
11	55	B	B	B	B	B
12	81	H	H	H	H	A
13	77	A	A	A	A	A
14	74	H	H	H	H	H
15	62	B	B	B	B	B
16	78	H	H	H	H	H
17	74	B	H	H	H	H
18	56.5	H	B	B	B	B
19	74	H	H	H	H	H
20	74.5	H	H	H	H	H
21	58	B	B	B	B	B
22	94.5	H	H	H	H	H
23	85.5	A	A	A	A	A
24	70.5	H	H	H	H	H
25	60	H	H	H	H	H
26	78.5	H	H	H	H	H
27	72.5	H	H	H	H	H
28	51	B	B	B	B	B
29	80.5	A	A	A	A	A
30	72	B	B	B	B	B
31	80	A	A	A	A	A
32	62	B	B	B	B	B
33	91.5	A	H	H	H	H
34	96	A	A	A	A	A
35	91	H	H	H	H	H
36	43	B	B	B	B	B
37	63.5	H	H	H	H	H
38	65.5	B	B	B	B	B
39	73.5	H	H	H	H	H
40	73	H	H	H	H	H
41	86	H	H	H	H	H
42	73	A	H	H	H	H
43	94	H	A	A	A	A
44	96	H	A	A	A	A
45	74	H	H	H	H	H
46	76	B	B	B	B	B
47	61	B	B	B	B	B
48	75	H	H	H	H	H
49	83	H	H	H	H	H
50	81	A	H	H	H	H
51	82	A	A	A	A	A
52	86	H	H	H	H	H
53	56	B	B	B	B	B
54	94.5	A	A	A	A	A
55	88	A	A	A	A	A
56	83.5	H	H	H	H	H
57	80.5	A	A	A	A	A
58	70.5	H	H	H	H	H
59	92	H	H	H	H	H
60	55.5	H	B	B	B	B
61	76	H	H	H	H	H
62	90.5	A	A	A	A	A
63	71	H	H	H	H	H
64	62	B	B	B	B	B
65	83	A	A	A	A	A
66	87.5	H	H	H	H	H
67	63.5	B	B	B	B	B
68	67	B	B	B	B	B
69	86.5	A	A	A	A	A
70	85	A	A	A	A	A
71	102.5	A	A	A	A	A
72	82.5	A	A	A	A	A
73	81.5	B	H	H	H	H
74	75.5	H	H	H	H	H
75	75.5	H	H	H	H	H
76	101.5	A	A	A	A	A
77	77.5	H	H	H	H	H
78	66	B	B	B	B	B
79	64	B	B	B	B	B
80	80.5	A	A	A	A	A
81	75	H	H	H	H	H
82	78.5	A	H	H	H	H
83	79	H	H	H	H	H
84	77	A	A	A	A	A
85	65	B	B	B	B	B
86	72	H	H	H	H	H
87	88.5	H	A	A	A	A
88	71	A	H	H	H	H
89	61	B	B	B	B	B
90	71.5	A	A	A	A	A
91	85	A	A	A	A	A
92	54	B	B	B	B	B
93	62	B	B	B	B	B
94	77.5	H	H	H	H	H
95	73	H	H	H	H	H
96	60	H	B	B	B	B
97	88	H	H	H	H	H
98	80	A	A	A	A	A
99	51	B	B	B	B	H
100	85	A	A	A	A	A
101	71	H	H	H	H	H
102	73	H	H	H	H	H
103	72	H	H	H	H	H
104	57.5	B	B	B	B	B
105	88.5	A	H	H	H	H
106	80	H	H	H	H	H
107	77.5	A	A	A	A	A
108	76.5	H	H	H	H	H
109	74	H	H	H	H	H
110	91	A	A	A	A	A
111	50.5	B	B	B	B	B
112	80	H	H	H	H	H
113	75	B	B	H	H	H
114	63	B	B	B	B	B
115	81.5	H	H	H	H	H
116	82	H	H	H	A	A
117	86	H	H	H	H	H
118	82	H	A	A	A	A
119	84.5	A	H	H	H	H
120	76.5	H	H	H	H	H
121	70	H	H	H	H	H
122	70	H	H	H	H	H
123	82	A	A	A	A	A
124	73	H	H	H	H	H
125	50.5	B	B	B	B	B
126	88	A	A	A	A	A
127	78	H	H	H	H	H
128	74	H	H	H	H	H
129	83.5	A	A	A	A	A
130	72	H	H	H	H	H
131	90	H	A	A	A	A
132	48	H	H	B	B	B
133	85.5	H	H	H	H	H
134	75	H	H	H	H	H
135	70.5	B	B	B	B	B
136	52	B	B	B	B	B
137	63	B	B	B	B	B
138	74	H	H	H	H	H
139	75	A	A	H	H	H
140	52	B	B	B	B	B
141	88	H	A	A	A	A
142	78	H	H	H	H	B
143	85	H	H	H	H	H
144	74	H	H	H	H	H
145	106	A	A	A	A	A
146	86	H	H	H	H	H
147	66	H	H	H	H	H
148	96	H	A	A	A	A
149	51	B	B	B	B	B
150	79	B	H	H	H	H
151	77	H	H	H	H	H
152	97	A	A	A	A	A
153	92	A	A	A	A	H
154	79	H	H	H	H	H
155	91.5	A	A	A	A	A
156	80.5	A	A	A	A	A
157	75	B	H	H	H	H
158	85.5	A	H	H	H	H
159	98	A	A	A	A	A
160	77	H	H	H	H	H
161	55	B	B	B	B	B
162	85	A	A	A	A	A
163	88.5	A	A	A	A	A
164	47	B	B	B	B	B
165	73	H	H	H	H	H
166	87	H	H	H	H	H
167	72	H	H	H	H	H
168	88	A	H	H	H	H
169	94	A	H	H	H	H
170	71	H	H	H	H	H
171	53	H	B	B	B	B
172	94	A	A	A	A	A
173	72	H	H	H	H	H
174	80	H	H	H	H	H
175	91.5	A	A	A	A	A
176	91.5	A	A	A	A	A
177	71	H	B	B	B	B
178	68.5	A	H	H	H	H
179	89	H	H	H	H	H
180	82	H	H	H	H	H
181	82.5	B	H	H	H	H
182	55	B	B	B	B	B
183	91	H	H	H	H	H
184	66.5	H	H	H	H	H
185	56	H	H	H	B	B
186	77	B	H	H	H	H
187	81	H	H	H	H	H
188	84	A	A	A	A	A
189	80.5	H	H	H	H	H
190	84.5	H	H	H	H	H
191	59	B	B	B	B	B
192	66	H	H	B	B	B
193	74	H	H	H	H	H
194	80	H	H	H	H	H
195	68	B	B	B	B	B
196	86	H	H	H	H	H
197	81	A	A	A	A	A
198	81	B	H	H	H	H
199	81.5	A	A	A	A	A
200	97.5	A	A	A	A	A
Note：A indicated K6-genotype; B indicated wph3-genotype; H indicated Heterozygous.

## Sheet: Table S3
Table S3 The 172 recombinant individuals selected from 562 F2 individuals
Individuals ID	Plant Height (cm)	Genotype
		M1	M2	M3	M4	M5
1	67	B	H	H	H	H
2	68	B	H	H	H	H
3	52	H	A	A	A	A
4	75	B	B	B	H	H
5	79.5	H	A	A	A	A
6	81	H	H	H	H	A
7	74	B	H	H	H	H
8	56.5	H	B	B	B	B
9	40	A	H	H	H	H
10	91.5	A	H	H	H	H
11	58.5	A	H	H	H	H
12	73	A	A	/	H	H
13	73	A	H	H	H	H
14	94	H	A	A	A	A
15	96	H	A	A	A	A
16	81	A	H	H	H	H
17	55.5	H	B	B	B	B
18	97	A	A	A	A	H
19	81.5	B	H	H	H	H
20	78.5	A	H	H	H	H
21	70	A	A	H	H	H
22	88.5	H	A	A	A	A
23	71	A	H	H	H	H
24	60	H	B	B	B	B
25	53	A	H	H	H	H
26	61.5	B	H	H	H	H
27	57	A	A	H	H	H
28	54	A	H	H	H	H
29	45	A	H	H	H	H
30	65	H	B	B	B	B
31	88.5	A	H	H	H	H
32	58	H	B	B	B	B
33	85	A	H	H	H	H
34	72.5	B	H	H	H	H
35	75	B	B	H	H	H
36	82	H	H	A	A	A
37	82	H	H	H	A	A
38	82	H	A	A	A	A
39	84.5	A	H	H	H	H
40	73	A	A	A	H	H
41	90	H	A	A	A	A
42	48	H	H	B	B	B
43	85.5	H	H	H	H	H
44	55	A	A	H	H	H
45	72.5	A	H	H	H	H
46	75	A	A	H	H	H
47	75	H	A	A	A	A
48	88	H	A	A	A	A
49	78	H	H	H	H	B
50	96	H	A	A	A	A
51	79	B	H	H	H	H
52	64	B	B	B	/	H
53	75	B	H	H	H	H
54	85.5	A	H	H	H	H
55	72	A	A	A	H	H
56	88	A	H	H	H	H
57	94	A	H	H	H	H
58	53	H	B	B	B	B
59	56	H	B	B	B	B
60	71	H	B	B	B	B
61	68.5	A	H	H	H	H
62	70	H	A	A	A	A
63	82.5	H	A	A	A	A
64	56	H	H	H	B	B
65	77	B	H	H	H	H
66	66	H	H	B	B	B
67	76	H	H	A	A	A
68	81	B	H	H	H	H
69	73	A	H	H	H	H
70	75	B	H	H	H	H
71	64.5	H	B	B	B	B
72	90	A	H	H	H	H
73	75	A	H	H	H	H
74	85	H	A	A	A	A
75	67	B	H	H	H	H
76	65	A	H	H	H	H
77	61	H	H	B	B	B
78	84	B	H	H	H	H
79	96	H	A	A	A	A
80	85	H	A	A	A	A
81	72	H	B	B	B	B
82	95	H	A	A	A	A
83	52	H	A	A	A	A
84	61	H	H	H	H	H
85	50	H	B	B	B	B
86	86	A	H	H	H	H
87	70	B	H	H	H	H
88	48.5	H	B	B	B	B
89	65	H	A	A	A	A
90	87.5	H	A	A	A	A
91	70	A	H	H	H	H
92	96.5	H	A	A	A	A
93	88.5	H	A	A	A	A
94	81.5	B	H	H	H	H
95	62	H	B	B	B	B
96	64	A	H	H	H	H
97	82	H	A	A	A	A
98	63.5	B	H	H	H	H
99	93	H	A	A	A	A
100	78	H	A	A	A	A
101	68	H	B	B	B	B
102	67	H	B	B	B	B
103	63	B	B	B	H	H
104	72.5	A	H	H	H	H
105	59.5	H	B	B	B	B
106	58	H	B	B	B	B
107	67	H	B	B	B	B
108	77.5	H	A	A	A	A
109	71	B	H	H	H	H
110	74.5	H	H	H	H	H
111	78	H	A	A	A	A
112	69.5	A	H	H	H	H
113	60.5	H	B	B	B	B
114	63.5	A	H	H	H	H
115	60	B	H	H	H	H
116	66	H	B	B	B	B
117	90.5	H	A	A	A	A
118	67.5	H	B	B	B	B
119	84.5	B	H	H	H	H
120	77.5	B	H	H	H	H
121	72	A	H	H	H	H
122	83.5	A	H	H	H	H
123	64.5	H	B	B	B	B
124	101	A	A	H	H	H
125	80.5	B	H	H	H	H
126	82.5	A	H	H	H	H
127	84	B	H	H	H	H
128	60	H	B	B	B	B
129	100	B	H	H	H	H
130	60	H	B	B	B	B
131	96.5	A	H	H	H	H
132	76	H	B	B	B	B
133	79	A	H	H	H	H
134	87	H	A	A	A	A
135	86.5	H	H	H	A	A
136	91.5	H	A	A	A	A
137	70	A	H	H	H	H
138	63	H	B	B	B	B
139	62	A	H	H	H	H
140	68.5	H	A	A	A	A
141	46	H	B	B	B	B
142	82	H	A	A	A	A
143	75	A	H	H	H	H
144	69	B	H	H	H	H
145	70	A	H	H	H	H
146	95.5	H	A	A	A	A
147	80.5	H	A	A	A	A
148	88.5	H	A	A	A	A
149	54.5	H	B	B	B	B
150	87	A	H	H	H	H
151	66.5	H	B	B	B	B
152	52	H	B	B	B	B
153	55	H	B	B	B	B
154	82.5	B	H	H	H	H
155	63	H	B	B	B	B
156	84	B	H	H	H	H
157	85	H	A	A	A	A
158	75	B	H	H	H	H
159	89.5	B	H	H	H	H
160	70.5	B	H	H	H	H
161	57	H	B	B	B	B
162	72.5	B	H	H	H	H
163	65	H	A	A	A	A
164	74	A	H	H	H	H
165	80	A	H	H	H	H
166	55	H	B	B	B	B
167	83	H	A	A	A	A
168	71	B	H	H	H	H
169	74	A	A	A	H	H
170	52	H	H	H	B	B
171	56	B	H	H	H	H
172	75.5	B	H	H	H	H
Note：A indicated K6-genotype; B indicated wph3-genotype; H indicated Heterozygous. / indicated no data

## Sheet: Table S4
Table S4 Sanger Sequencing Markers
Marker type	Marker name	Position (V2.1)	Variants	Primer sequences		Tm (℃)	Product size
				Forward (5'-3')	Reverse (5'-3')
Sanger Sequencing	M6	803270656	A/G	TGTAATCCATCATCGGGCTGT	GCCCTTGATCATGTGCCCAA	59.9	456 bp
	M7	803441431	G/A	AGGCCATCAACAATACCTGAGG	TGCAAAGTTGGAGAGTGGGT	59.7	562bp
	M8	803453247	C/A	GTGCGGAATTCTAGGCTCGG	AACCAGACTCCTCAGCCCTA	60	972bp
	M9	804842428	C/T	GCGGGAGAGGGAGTATGAAATA	GCTACCTTCATGTGGACCCA	59.2	722bp
	M10	799551900	C/T	CTGCACTCTTCTCCCCATGT	ATGCTGGCCTTCTGTTTCAG	59	475bp

## Sheet: Table S5
Table S5 26 high-confidence genes with high or moderate variation within the target region
Position	Reference	Alternation	Feature	Impact	Gene	Variant_DNA_Level	Variant_Protein_Level
799551900	C	T	missense_variant	MODERATE	TraesCS2B03G1524800	c.509G>A	p.Arg170His
799673917	G	C	missense_variant	MODERATE	TraesCS2B03G1525100	c.355C>G	p.Arg119Gly
799674010	C	T	missense_variant	MODERATE	TraesCS2B03G1525100	c.262G>A	p.Val88Met
799674019	C	G	missense_variant	MODERATE	TraesCS2B03G1525100	c.253G>C	p.Val85Leu
799674025	G	T	missense_variant	MODERATE	TraesCS2B03G1525100	c.247C>A	p.Gln83Lys
799674102	C	T	missense_variant	MODERATE	TraesCS2B03G1525100	c.170G>A	p.Gly57Asp
799674112	G	A	stop_gained	HIGH	TraesCS2B03G1525100	c.160C>T	p.Gln54*
799674224	A	C	stop_gained	HIGH	TraesCS2B03G1525100	c.48T>G	p.Tyr16*
799674258	C	A	missense_variant	MODERATE	TraesCS2B03G1525100	c.14G>T	p.Gly5Val
799725195	C	G	missense_variant	MODERATE	TraesCS2B03G1525600	c.388G>C	p.Glu130Gln
799729174	C	G	missense_variant	MODERATE	TraesCS2B03G1525700	c.576G>C	p.Glu192Asp
799729260	A	T	missense_variant	MODERATE	TraesCS2B03G1525700	c.490T>A	p.Tyr164Asn
799729427	C	A	missense_variant	MODERATE	TraesCS2B03G1525700	c.323G>T	p.Cys108Phe
799729940	C	T	missense_variant	MODERATE	TraesCS2B03G1525700	c.67G>A	p.Ala23Thr
799815575	A	G	missense_variant	MODERATE	TraesCS2B03G1526600	c.1789T>C	p.Ser597Pro
799815908	T	C	missense_variant	MODERATE	TraesCS2B03G1526600	c.1456A>G	p.Ser486Gly
799913580	G	A	missense_variant	MODERATE	TraesCS2B03G1527200	c.374G>A	p.Gly125Asp
799913645	A	G	missense_variant	MODERATE	TraesCS2B03G1527200	c.439A>G	p.Ile147Val
799913713	T	G	missense_variant	MODERATE	TraesCS2B03G1527200	c.507T>G	p.Asn169Lys
799913789	A	G	missense_variant	MODERATE	TraesCS2B03G1527200	c.583A>G	p.Met195Val
799914159	C	A	missense_variant	MODERATE	TraesCS2B03G1527200	c.850C>A	p.His284Asn
799914878	C	A	missense_variant	MODERATE	TraesCS2B03G1527200	c.1447C>A	p.Arg483Ser
799914879	G	A	missense_variant	MODERATE	TraesCS2B03G1527200	c.1448G>A	p.Arg483His
799914975	A	G	missense_variant	MODERATE	TraesCS2B03G1527200	c.1544A>G	p.Asp515Gly
799915052	A	C	missense_variant	MODERATE	TraesCS2B03G1527200	c.1621A>C	p.Lys541Gln
799996768	G	T	missense_variant	MODERATE	TraesCS2B03G1527600	c.524C>A	p.Ala175Glu
800072182	C	T	missense_variant	MODERATE	TraesCS2B03G1527800	c.1214G>A	p.Gly405Asp
800877258	C	G	missense_variant	MODERATE	TraesCS2B03G1531500	c.296G>C	p.Gly99Ala
800877314	C	G	missense_variant	MODERATE	TraesCS2B03G1531500	c.240G>C	p.Glu80Asp
800879863	A	T	missense_variant	MODERATE	TraesCS2B03G1531600	c.553A>T	p.Arg185Trp
800881606	C	T	missense_variant	MODERATE	TraesCS2B03G1531700	c.1303G>A	p.Gly435Arg
800882423	A	G	missense_variant	MODERATE	TraesCS2B03G1531700	c.719T>C	p.Phe240Ser
800883215	G	C	missense_variant	MODERATE	TraesCS2B03G1531700	c.19C>G	p.Gln7Glu
800883232	A	G	start_lost	HIGH	TraesCS2B03G1531700	c.2T>C	p.Met1?
800983839	C	G	missense_variant	MODERATE	TraesCS2B03G1532100	c.921G>C	p.Met307Ile
800984005	T	C	missense_variant	MODERATE	TraesCS2B03G1532100	c.755A>G	p.His252Arg
800984050	A	C	missense_variant	MODERATE	TraesCS2B03G1532100	c.710T>G	p.Leu237Arg
800984074	C	G	missense_variant	MODERATE	TraesCS2B03G1532100	c.686G>C	p.Trp229Ser
800984380	T	C	missense_variant	MODERATE	TraesCS2B03G1532100	c.380A>G	p.Lys127Arg
800984674	A	G	missense_variant	MODERATE	TraesCS2B03G1532100	c.140T>C	p.Val47Ala
801590574	A	G	missense_variant	MODERATE	TraesCS2B03G1534200	c.395A>G	p.Asn132Ser
801590750	G	C	missense_variant	MODERATE	TraesCS2B03G1534200	c.571G>C	p.Ala191Pro
801591639	C	T	missense_variant	MODERATE	TraesCS2B03G1534200	c.1460C>T	p.Ala487Val
801591708	T	C	missense_variant	MODERATE	TraesCS2B03G1534200	c.1529T>C	p.Phe510Ser
801592026	A	G	missense_variant	MODERATE	TraesCS2B03G1534200	c.1847A>G	p.Glu616Gly
801600348	C	A	missense_variant	MODERATE	TraesCS2B03G1534400	c.247G>T	p.Ala83Ser
802985079	A	G	missense_variant	MODERATE	TraesCS2B03G1537400	c.695A>G	p.Lys232Arg
802985141	A	G	missense_variant	MODERATE	TraesCS2B03G1537400	c.757A>G	p.Ile253Val
802985241	T	C	missense_variant	MODERATE	TraesCS2B03G1537400	c.857T>C	p.Ile286Thr
802985399	A	G	missense_variant	MODERATE	TraesCS2B03G1537400	c.1015A>G	p.Asn339Asp
803084361	G	A	missense_variant	MODERATE	TraesCS2B03G1537900	c.286C>T	p.Leu96Phe
803096435	G	A	missense_variant	MODERATE	TraesCS2B03G1538000	c.1223C>T	p.Ala408Val
803096717	T	C	missense_variant	MODERATE	TraesCS2B03G1538000	c.941A>G	p.His314Arg
803096735	G	A	missense_variant	MODERATE	TraesCS2B03G1538000	c.923C>T	p.Thr308Met
803140989	C	T	missense_variant	MODERATE	TraesCS2B03G1538300	c.394G>A	p.Val132Ile
803234208	C	T	missense_variant	MODERATE	TraesCS2B03G1538600	c.547G>A	p.Gly183Ser
803235418	G	T	stop_gained	HIGH	TraesCS2B03G1538600	c.110C>A	p.Ser37*
803246032	G	C	missense_variant	MODERATE	TraesCS2B03G1538800	c.733C>G	p.Arg245Gly
803246176	T	C	missense_variant	MODERATE	TraesCS2B03G1538800	c.589A>G	p.Ile197Val
803246787	G	C	missense_variant	MODERATE	TraesCS2B03G1538800	c.133C>G	p.Arg45Gly
803246794	G	C	missense_variant	MODERATE	TraesCS2B03G1538800	c.126C>G	p.Asp42Glu
803246829	C	T	missense_variant	MODERATE	TraesCS2B03G1538800	c.91G>A	p.Gly31Ser
803269274	T	C	missense_variant	MODERATE	TraesCS2B03G1539000	c.463A>G	p.Lys155Glu
803269361	T	C	missense_variant	MODERATE	TraesCS2B03G1539000	c.376A>G	p.Lys126Glu
803269460	C	T	missense_variant	MODERATE	TraesCS2B03G1539000	c.277G>A	p.Gly93Arg
803270591	G	A	missense_variant	MODERATE	TraesCS2B03G1539100	c.245C>T	p.Ala82Val
803273626	C	T	missense_variant&splice_region_variant	MODERATE	TraesCS2B03G1539200	c.215G>A	p.Gly72Asp
803280539	A	C	missense_variant	MODERATE	TraesCS2B03G1539300	c.1045T>G	p.Ser349Ala
803280965	C	G	missense_variant	MODERATE	TraesCS2B03G1539300	c.619G>C	p.Asp207His
803281652	C	T	missense_variant	MODERATE	TraesCS2B03G1539300	c.205G>A	p.Ala69Thr
803383220	C	T	missense_variant	MODERATE	TraesCS2B03G1539700	c.221G>A	p.Gly74Asp
803383238	C	T	missense_variant	MODERATE	TraesCS2B03G1539700	c.203G>A	p.Arg68Lys
803383335	C	T	missense_variant	MODERATE	TraesCS2B03G1539700	c.106G>A	p.Ala36Thr
803383356	T	C	missense_variant	MODERATE	TraesCS2B03G1539700	c.85A>G	p.Ile29Val
803453247	C	A	missense_variant	MODERATE	TraesCS2B03G1540400	c.112G>T	p.Asp38Tyr

## Sheet: Table S6
Table S6 DNA variants on Rht-B1 based on exome sequencing.
#CHROM	POS	ID	Gene	REF	SNP	Alteration	K6		wph3
							depth	Frequency	depth	Frequency
4B	33614738	TraesCS4B03G0093100	Rht-B1	C	T	190C>T, Gln64*	16	1	20	0
4B	33615162			A	G	614A>G, Glu205Gly	16	0	14	1

## Sheet: Table S7
Table S7 Expression level of candidate genes in peduncle
#ID	K1-1_FPKM	K1-2_FPKM	K1-3_FPKM	wph3-1_FPKM	wph3-2_FPKM	wph3-3_FPKM	K1_vs_wph3_DESeq2_FDR	K1_vs_wph3_DESeq2_log2FC	Swiss_Prot_annotation
TraesCS2B03G1527800	5.95257	6.97499	7.05384	6.11913	6.86516	6.00207	0.477455	-0.179079	SKP1-interacting partner 15
TraesCS2B03G1539200	0	0	0	0	0	0	--	--	Peroxidase 12
