# Supplementary material for: Molecular mapping of a novel non-canonical gibberellin-sensitive dwarfing gene Rht29 in wheat (Triticum aestivum)
Source: Research Square preprint supplement (doi:10.21203/rs.3.rs-8634203/v1), 2026-02-18
Supplement: Supplementary file 2 [file d04f0d73e14623765dbe5a95.xlsx]

## Sheet: Table 1
Table 1 Candidate SNPs in the target interval.
Position	SNP	Type	Gene	Variant DNA	Variant Protein
800072182	C/T	missense_variant	TraesCS2B03G1527800	G1214A	Gly405Asp
803273626	C/T	missense_variant & splice_region_variant	TraesCS2B03G1539200	G215A	Gly72Asp
